# Supplementary material for: Synthesis, characterisation and evaluation of a novel copper-64 complex with selective uptake in EMT-6 cells under hypoxic conditions
Source: Royal Society of Chemistry journal article supplement (doi:10.1039/c3dt50960e), 2013-01-01
Supplement: c3dt50960e.pdf [file c3dt50960e.pdf]

## Electronic Supplementary Information

### Synthesis, characterisation and evaluation of a novel copper-64 complex with selective uptake on EMT-6 cells under hypoxic conditions

James C. Knight,<sup>a</sup> Melinda Wuest,<sup>a</sup> Fawaz A. Saad,<sup>b</sup> Monica Wang,<sup>a</sup> David W. Chapman,<sup>a</sup> Hans-Soenke Jans,<sup>a</sup> Suzanne E. Lapi,<sup>c</sup> Benson M. Kariuki,<sup>d</sup> Angelo J. Amoroso,<sup>\*d</sup> and Frank Wuest<sup>\*a</sup>

<sup>a</sup> *Department of Oncology, University of Alberta, Edmonton, AB, T6G 1Z2, Canada. Tel: +1 780 989 8150; E-mail: wuest@ualberta.ca*

<sup>b</sup> *College of Applied Science, Chemistry Department, Umm Al-Qura University (UQU), Makkah, Saudi Arabia. E-mail: fasaad@uqu.edu.sa*

<sup>c</sup> *Department of Radiology, Washington University School of Medicine, 510 S. Kingshighway Blvd, St. Louis, MO 63110, United States. Fax: 314 362 9940; Tel: 314 362 4696; E-mail: lapis@mir.wustl.edu*

<sup>d</sup> *Cardiff University of Wales – Department of Chemistry, Main Building, Park Place, Cardiff, CF10 3AT, United Kingdom. Fax: +44 (0)29 208 74030; Tel: +44 (0)29 208 74077; E-mail: amorosoaj@cardiff.ac.uk*

### Table of Contents

#### 1. Experimental section

##### 1.1 Vibrational spectra

##### 1.2 Electronic absorption spectra

#### 2. Supporting figures

Fig. S1. Cyclic voltammogram of Cu-MTUBo complex

Fig. S2. Peak current *versus* square root of scan rate for Cu-MTUBo complex.

Fig. S3 Challenging <sup>64</sup>Cu-MTUBo with DOTA, NOTA, CB-TE2A, and DiAmSar.

## 1. Experimental section

### 1.1 Infrared spectra

According to the literature, the amide carbonyl stretch appears at  $\sim 1620\text{--}1670\text{ cm}^{-1}$ . Similarly, in the infrared spectrum of MTUBo, a carbonyl stretch is observed at  $1671\text{ cm}^{-1}$  (Table 1). Even though the carbonyl does not directly co-ordinate to the copper cation, it appears to be at lower energy when the ligand co-ordinates to copper perhaps due to the formation of a stronger intramolecular hydrogen bond within the thiourea arm. A strong peak at  $1331\text{ cm}^{-1}$ , assigned to the  $\nu(\text{C}=\text{S})$  stretch also shifted to lower energy ( $1261\text{ cm}^{-1}$ ) upon co-ordination of the sulfur atom to the metal which reduces the bond order and thus weakens the  $\text{C}=\text{S}$  bond. The shift of the pyridine ring vibration at around  $1600\text{ cm}^{-1}$  and  $1450\text{ cm}^{-1}$  indicates co-ordination from the pyridine ring nitrogens. Two characteristic unsplit infrared active bands at  $\sim 1090\text{ cm}^{-1}$  and  $\sim 625\text{ cm}^{-1}$  are indicative of ionic perchlorate ( $T_d$  symmetry).<sup>1,2</sup> All of these features are consistent with the X-ray diffraction data.

**Table 1:** IR Stretching Frequencies of  $\text{L}^1$  and complexes\*

| Compound        | $\nu(\text{C}=\text{O})$ | $\nu(\text{C}=\text{S})$ | $\nu(\text{O}-\text{H})$ | $\nu(\text{C}=\text{N}), \nu(\text{C}=\text{C})$ | $\nu(\text{Cl}-\text{O})$ |
|-----------------|--------------------------|--------------------------|--------------------------|--------------------------------------------------|---------------------------|
| <b>MTUBo</b>    | 1671(s)                  | 1331(s)                  | 3431(br)                 | 1540(s), 1455(s)                                 | -                         |
| <b>Cu-MTUBo</b> | 1609(s)                  | 1261(s)                  | 3416(br)                 | 1539(s), 1433(s)                                 | 1088(s), 625(s)           |

\*IR spectra measured as KBr discs

### 1.2 Electronic absorption spectra

The electronic spectra of MTUBo and Cu-MTUBo have been measured and the data are presented in Table 2. The electronic absorption spectrum for MTUBo contains two strong peaks between 268 nm and 310 nm characteristic of intra-ligand pyridyl  $\pi\text{--}\pi^*$  transitions. The copper compound features an  $\text{N}_4\text{S}_1$  chromophore surrounding the  $\text{Cu}^{\text{II}}$  centre and exhibits an approximately  $\text{C}_{3v}$  symmetry in the solid state forming a trigonal bipyramidal geometry. According to crystal field theory, the trigonal bipyramidal geometry is not Jahn-Teller active as the odd electron is in a non-degenerate orbital. There are two transitions that would occur in such geometry:  $d_{xz}, d_{yz} \rightarrow dz^2$  at higher energy and  $d_{xy}, d_{x^2-y^2} \rightarrow dz^2$ . Thus, two peaks are observed for Cu-MTUBo ( $15,850$  and  $12,165\text{ cm}^{-1}$ ) and these transitions may be labelled as  $(d_{xz}, d_{yz} \rightarrow dz^2)$  and  $(d_{xy}, d_{x^2-y^2} \rightarrow dz^2)$ , respectively. Additionally, the slight shoulder at  $\sim 950\text{ nm}$  suggests that perhaps in solution the compound has a different structure to that in the solid state. However, this spectral pattern is typical of a five co-ordinate copper (II) complex with a trigonal bipyramidal based geometry.<sup>3,4</sup> While the bands at  $15,850$  and  $12,160\text{ cm}^{-1}$  are tentatively assigned to  $^2\text{A}_1' \rightarrow ^2\text{E}''$  and the symmetry allowed  $^2\text{A}_1' \rightarrow ^2\text{E}'$  transitions respectively in  $\text{D}_{3h}$  symmetry,<sup>5</sup> the little shoulder at  $\sim 950\text{ nm}$  does suggest a lower symmetry.

**Table 2:** Electronic spectral assignments for MTUBo and Cu-MTUBo <sup>a</sup>

| Compound        | $\pi$ - $\pi^*$ transitions / $\lambda$ (nm) | MLCT / $\lambda$ (nm)  | d-d transitions / $\lambda$ (nm) | $\Delta$ (cm <sup>-1</sup> ) |
|-----------------|----------------------------------------------|------------------------|----------------------------------|------------------------------|
| <b>MTUBo</b>    | 268(62,300), 310(33,500)                     | -                      | -                                | -                            |
| <b>Cu-MTUBo</b> | 255(13,100), 280(8,500)                      | 326(8,700), 353(5,460) | 631(95), 822(140), 950(115)      | 10,530                       |

<sup>a</sup> Performed in CH<sub>3</sub>CN solution at room temperature; Numbers in parentheses indicate molar absorption coefficients  $\epsilon$  (M<sup>-1</sup>cm<sup>-1</sup>).

2. Supporting Figures

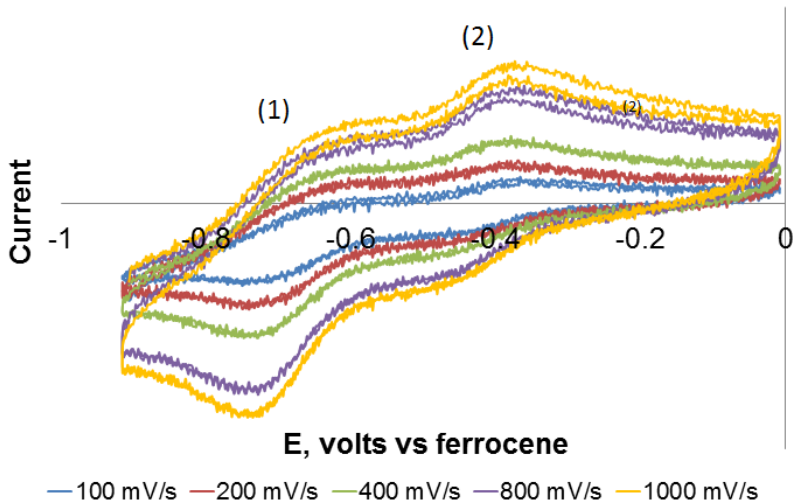

Fig. S1 Cyclic voltammogram of Cu-MTUBo complex.

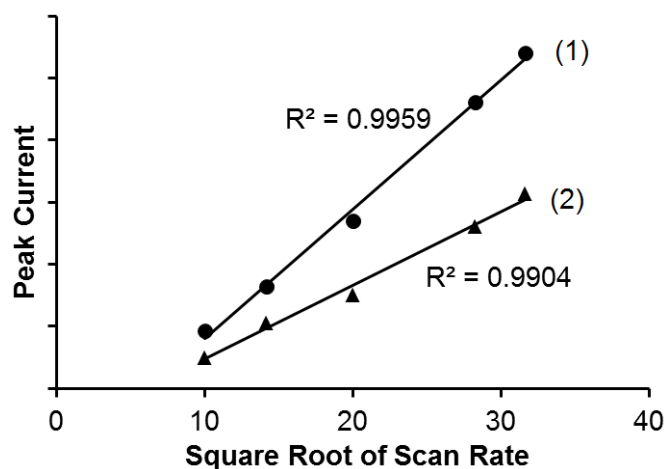

Fig. S2 Peak current *versus* square root of scan rate for Cu-MTUBo complex.

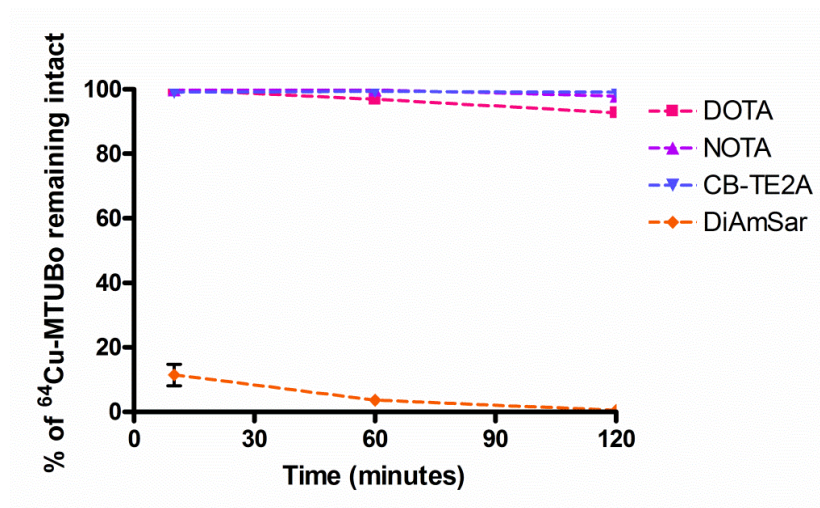

Fig. S3 Challenging  $^{64}\text{Cu}$ -MTUBo with DOTA, NOTA, CB-TE2A, and DiAmSar.

#### References:

1. M. G. B. Drew, J. Nelson, F. Esho, V. McKee and S. M. Nelson, *J. Chem. Soc., Dalton Trans.*, 1982, 1837 - 1843.
2. P. Dapporto, G. De Munno, A. Segà and C. Mealli, *Inorg. Chim. Acta*, 1984, **83**, 171-176.
3. B. J. Hathaway, *Comprehensive Coordination Chemistry*, Pergamon, Oxford, 1987.
4. C.-C. Su, W.-S. Lu, T.-Y. Hui, T.-Y. Chang, S.-L. Wang and F.-L. Liao, *Polyhedron*, 1993, **12**, 2249-2259.
5. D. Reinen and M. Atanasov, *Chem. Phys.*, 1989, **136**, 27-46.
